# Supplementary material for: Transferability of Cardiopulmonary Parameters between Treadmill and Cycle Ergometer Testing in Male Triathletes—Prediction Formulae
Source: MDPI journal article supplement (doi:10.3390/ijerph19031830), 2022-02-06
Supplement: s1 [file s1]

**Supplementary Table S3.** Additional running prediction equations.

| Category                     | Multiple Regression Equation                                                                                                                                                                                                                   | MAE  | Adjusted R <sup>2</sup> |
|------------------------------|------------------------------------------------------------------------------------------------------------------------------------------------------------------------------------------------------------------------------------------------|------|-------------------------|
| VO <sub>2AT</sub><br>(eqs)   | $17.03_{[0.176]SE} + 0.49_{[0.04]SEX} cVO_{2RCP}$                                                                                                                                                                                              | 2.21 | 0.56                    |
| VO <sub>2AT</sub><br>(eqms)  | ---                                                                                                                                                                                                                                            | ---  | ---                     |
| HR <sub>AT</sub><br>(eqs)    | $43.84_{[17.50]SE} - 0.76_{[0.36]SEX} cVO_{2AT} - 0.002_{[0.08]SEX} cVE_{AT} + 0.74_{[0.07]SEX} cHR_{max} + 0.39_{[0.27]SEX} cVO_{2RCP} - 1.20_{[0.50]SEX} BMI + 0.73_{[0.25]SEX} BF$                                                          | 5.36 | 0.50                    |
| HR <sub>AT</sub><br>(eqms)   | $8.06_{[12.89]SE} + 0.76_{[0.07]SEX} cHR_{max} + 0.42_{[0.16]SEX} BF$                                                                                                                                                                          | 5.72 | 0.50                    |
| VO <sub>2RCP</sub><br>(eqs)  | $14.67_{[2.57]SE} + 0.23_{[0.12]SEX} cVO_{2AT} - 0.08_{[0.36]SEX} cVE_{AT} + 0.08_{[0.06]SEX} cFR_{AT} + 0.04_{[0.01]SEX} cP_{AT} - 0.45_{[0.09]SEX} cVO_{2max}$                                                                               | 2.44 | 0.72                    |
| VO <sub>2RCP</sub><br>(eqms) | $12.83_{[2.11]SE} + 0.60_{[0.04]SEX} cVO_{2max} + 0.03_{[0.01]SEX} cP_{AT}$                                                                                                                                                                    | 2.28 | 0.71                    |
| HR <sub>RCP</sub><br>(eqs)   | $67.13_{[13.00]SE} - 1.17_{[0.31]SEX} cVO_{2AT} - 0.07_{[0.02]SEX} cVE_{max} + 0.01_{[0.002]SEX} cVO_{2ATA} + 0.77_{[0.05]SEX} cHR_{max} + 0.49_{[0.21]SEX} cVO_{2RCP} - 0.15_{[0.05]SEX} Age - 0.59_{[0.28]SEX} BMI$                          | 3.47 | 0.76                    |
| HR <sub>RCP</sub><br>(eqms)  | $33.70_{[8.69]SE} - 0.25_{[0.09]SEX} cVO_{2AT} + 0.83_{[0.05]SEX} cHR_{max}$                                                                                                                                                                   | 3.80 | 0.71                    |
| VO <sub>2max</sub><br>(eqs)  | $28.49_{[5.23]SE} + 0.39_{[0.15]SEX} cVO_{2AT} - 0.06_{[0.03]SEX} cHR_{AT} - 0.21_{[0.08]SEX} cFR_{AT} - 0.003_{[0.001]X} cVO_{2ATA} - 0.03_{[0.01]X} cP_{AT} - 0.14_{[0.06]X} cFR_{RCP} + 0.49_{[0.09]SEX} cVO_{2max} - 0.07_{[0.03]SEX} Age$ | 2.38 | 0.74                    |
| VO <sub>2max</sub><br>(eqms) | $16.51_{[2.10]SE} + 0.26_{[0.12]SEX} cVO_{2AT} + 0.55_{[0.09]SEX} cVO_{2max}$                                                                                                                                                                  | 2.57 | 0.71                    |
| HR <sub>max</sub><br>(eqs)   | $89.45_{[26.65]SE} - 0.25_{[0.09]SEX} cVO_{2AT} - 0.02_{[0.02]SEX} cVE_{max} - 28.49_{[24.10]SEX} cRER_{RCP} + 0.84_{[0.05]SEX} cHR_{max} - 0.14_{[0.05]SEX} Age - 0.60_{[0.30]SEX} BMI + 0.30_{[0.16]SEX} BF$                                 | 3.35 | 0.79                    |
| HR <sub>max</sub><br>(eqms)  | $27.43_{[8.18]SE} + 0.88_{[0.05]SEX} cHR_{max}$                                                                                                                                                                                                | 3.72 | 0.75                    |

Abbreviations: MAE, mean absolute error; VO<sub>2AT</sub>, relative VO<sub>2</sub> at AT (mL·min<sup>-1</sup>·kg<sup>-1</sup>); CVO<sub>2RCP</sub>, cycling relative VO<sub>2</sub> at RCP (mL·min<sup>-1</sup>·kg<sup>-1</sup>); eqs, equation in the simplified form; eqms, equation in the most simplified form; HR<sub>AT</sub>, heart rate at AT (bpm); CVO<sub>2AT</sub>, cycling relative VO<sub>2</sub> at AT (mL·min<sup>-1</sup>·kg<sup>-1</sup>); CVE<sub>AT</sub>, cycling pulmonary ventilation at AT (L·min<sup>-1</sup>); CHR<sub>max</sub>, cycling maximal heart rate (bpm); BMI, body mass index (kg·m<sup>-2</sup>); BF, body fat (%); VO<sub>2RCP</sub>, relative VO<sub>2</sub> at RCP (mL·min<sup>-1</sup>·kg<sup>-1</sup>); cFR<sub>AT</sub>, cycling respiratory rate at AT (breaths per minute); cP<sub>AT</sub>, cycling power at AT (watt); CVO<sub>2max</sub>, cycling relative maximum VO<sub>2</sub> (mL·min<sup>-1</sup>·kg<sup>-1</sup>); HRR<sub>RCP</sub>, heart rate at RCP (bpm); CVE<sub>max</sub>, cycling maximal pulmonary ventilation (L·min<sup>-1</sup>); CVO<sub>2ATA</sub>, cycling absolute VO<sub>2</sub> at AT (mL·min<sup>-1</sup>); Age, age (years); VO<sub>2max</sub>, relative maximum VO<sub>2</sub> (mL·min<sup>-1</sup>·kg<sup>-1</sup>); CHR<sub>AT</sub>, cycling heart rate at AT (bpm); cFR<sub>RCP</sub>, cycling respiratory rate at RCP (breaths per minute); HR<sub>max</sub>, maximal heart rate (bpm); cRER<sub>RCP</sub>, cycling respiratory exchange ratio at RCP.
