# Supplementary material for: Transferability of Cardiopulmonary Parameters between Treadmill and Cycle Ergometer Testing in Male Triathletes—Prediction Formulae
Source: MDPI journal article supplement (doi:10.3390/ijerph19031830), 2022-02-06
Supplement: s1 [file s1]

**Supplementary Table S2.** Additional cycling prediction equations.

| Category                     | Multiple Regression Equation                                                                                                                                                             | MAE  | Adjusted R <sup>2</sup> |
|------------------------------|------------------------------------------------------------------------------------------------------------------------------------------------------------------------------------------|------|-------------------------|
| VO <sub>2AT</sub><br>(eqs)   | $10.65_{[5.37]SE} + 0.55_{[0.12]SEX} RVO_{2AT} - 0.06_{[0.03]SEX} RVE_{AT} - 0.07_{[0.03]SEX} RHR_{AT} - 0.36_{[0.17]SEX} RLac_{max} + 0.39_{[0.08]SEX} RVO_{2max}$                      | 2.26 | 0.70                    |
| VO <sub>2AT</sub><br>(eqms)  | $-7.20_{[2.69]SE} + 0.33_{[0.10]SEX} RVO_{2AT} + 0.53_{[0.07]SEX} RVO_{2max}$                                                                                                            | 2.36 | 0.66                    |
| HR <sub>AT</sub><br>(eqs)    | $2.48_{[14.26]SE} + 0.40_{[0.12]SEX} RHR_{AT} + 0.40_{[0.12]SEX} RHR_{max}$                                                                                                              | 6.52 | 0.45                    |
| HR <sub>AT</sub><br>(eqms)   | ---                                                                                                                                                                                      | ---  | ---                     |
| VO <sub>2RCP</sub><br>(eqs)  | $-1.73_{[5.79]SE} + 0.80_{[0.14]SEX} RVO_{2AT} - 0.004_{[0.001]SEX} RVO_{2ATA} - 0.56_{[0.18]SEX} RLac_{max} + 0.46_{[0.08]SEX} RVO_{2max} + 0.64_{[0.24]SEX} BMI - 0.40_{[0.11]SEX} BF$ | 2.49 | 0.77                    |
| VO <sub>2RCP</sub><br>(eqms) | $5.53_{[4.14]SE} + 0.64_{[0.14]SEX} RVO_{2AT} - 0.003_{[0.001]SEX} RVO_{2ATA} + 0.49_{[0.09]SEX} RVO_{2max} - 0.25_{[0.10]SEX} BF$                                                       | 2.65 | 0.74                    |
| HR <sub>RCP</sub><br>(eqs)   | $18.94_{[10.80]SE} + 0.82_{[0.06]SEX} RHR_{max} - 0.36_{[0.14]SEX} BF$                                                                                                                   | 4.85 | 0.64                    |
| HR <sub>RCP</sub><br>(eqms)  | $12.43_{[10.77]SE} + 0.82_{[0.06]SEX} RHR_{max}$                                                                                                                                         | 4.88 | 0.62                    |
| VO <sub>2max</sub><br>(eqs)  | $6.75_{[4.06]SE} + 0.07_{[0.03]SEX} RfR_{RCP} + 0.51_{[0.12]SEX} RVO_{2max} + 0.40_{[0.13]SEX} RVO_{2RCP} - 0.39_{[0.09]SEX} BF$                                                         | 2.59 | 0.76                    |
| VO <sub>2max</sub><br>(eqms) | $12.05_{[4.06]SE} + 0.84_{[0.06]SEX} RVO_{2max} - 0.41_{[0.09]SEX} BF$                                                                                                                   | 2.80 | 0.75                    |
| HR <sub>max</sub><br>(eqs)   | $25.04_{[8.10]SE} + 0.25_{[0.13]SEX} RHR_{RCP} + 0.61_{[0.27]SEX} RLac_{max} + 0.59_{[0.12]SEX} RHR_{max} - 0.32_{[0.10]SEX} BF$                                                         | 3.33 | 0.77                    |
| HR <sub>max</sub><br>(eqms)  | $20.36_{[8.25]SE} + 0.87_{[0.05]SEX} RHR_{max}$                                                                                                                                          | 3.61 | 0.75                    |

Abbreviations: MAE, mean absolute error; VO<sub>2AT</sub>, relative VO<sub>2</sub> at AT (mL·min<sup>-1</sup>·kg<sup>-1</sup>); eqs, equation in the simplified form; RVO<sub>2AT</sub>, running relative VO<sub>2</sub> at AT (mL·min<sup>-1</sup>·kg<sup>-1</sup>); RVEAT, running pulmonary ventilation at AT (L·min<sup>-1</sup>); RHRAT, running heart rate at AT (bpm); RLac<sub>max</sub>, running maximal lactate concentration (mmol·L<sup>-1</sup>); RVO<sub>2max</sub>, running relative maximum VO<sub>2</sub> (mL·min<sup>-1</sup>·kg<sup>-1</sup>); eqms, equation in the most simplified form; RHR<sub>max</sub>, running maximal heart rate (bpm); RVO<sub>2ATA</sub>, running absolute VO<sub>2</sub> at AT (mL·min<sup>-1</sup>); BMI, body mass index (kg·m<sup>-2</sup>); BF, body fat (%); RfRRCP, running respiratory frequency at RCP (breaths per minute); RVO<sub>2RCP</sub>, running relative VO<sub>2</sub> at RCP (mL·min<sup>-1</sup>·kg<sup>-1</sup>); RHR<sub>RCP</sub>, running heart rate at RCP (bpm).
