# Supplementary material for: Transferability of Cardiopulmonary Parameters between Treadmill and Cycle Ergometer Testing in Male Triathletes—Prediction Formulae
Source: MDPI journal article supplement (doi:10.3390/ijerph19031830), 2022-02-06
Supplement: s1 [file s1]

**Supplementary Table S1.** CPET characteristics.

| CPET characteristics                 |         |         |         |        |         |         |         |        |     |    |
|--------------------------------------|---------|---------|---------|--------|---------|---------|---------|--------|-----|----|
| Variable                             | Mean    | TE      |         |        | SD      | Mean    | CE      |        |     | SD |
|                                      |         | CI      | 95%     |        |         |         | CI      | 95%    |     |    |
|                                      |         |         | -95%    | 95%    |         |         |         | -95%   | 95% |    |
| VO <sub>2AT</sub>                    | 38.30   | 37.56   | 39.04   | 4.62   | 32.52   | 31.67   | 33.36   | 5.27   |     |    |
| VO <sub>2ATA</sub>                   | 2970.25 | 2913.35 | 3027.15 | 355.05 | 2512.01 | 2455.11 | 2568.91 | 355.05 |     |    |
| RER <sub>AT</sub>                    | 0.89    | 0.88    | 0.89    | 0.04   | 0.86    | 0.85    | 0.87    | 0.05   |     |    |
| HR <sub>AT</sub>                     | 147.59  | 145.90  | 149.27  | 10.52  | 134.38  | 132.47  | 136.28  | 11.89  |     |    |
| VE <sub>AT</sub>                     | 81.86   | 80.10   | 83.63   | 11.01  | 65.63   | 63.96   | 67.29   | 10.39  |     |    |
| fR <sub>AT</sub>                     | 36.54   | 35.38   | 37.71   | 7.27   | 28.50   | 27.70   | 29.30   | 5.00   |     |    |
| La <sub>CAT</sub>                    | 1.80    | 1.73    | 1.87    | 0.44   | 1.70    | 1.64    | 1.76    | 0.38   |     |    |
| VO <sub>2RCP</sub>                   | 47.28   | 46.35   | 48.20   | 5.77   | 43.55   | 42.36   | 44.74   | 7.43   |     |    |
| VO <sub>2RCPA</sub>                  | 3665.26 | 3595.82 | 3734.70 | 433.30 | 3369.25 | 3289.07 | 3449.42 | 500.28 |     |    |
| VO <sub>2RCP</sub>                   | 3698.03 | 3622.19 | 3773.88 | 421.37 | 3421.56 | 3346.81 | 3496.31 | 415.31 |     |    |
| RER <sub>RCP</sub>                   | 1.00    | 1.00    | 1.00    | 0.03   | 1.01    | 1.00    | 1.01    | 0.02   |     |    |
| HR <sub>RCP</sub>                    | 170.90  | 169.27  | 172.53  | 10.19  | 161.54  | 159.71  | 163.37  | 11.44  |     |    |
| VE <sub>RCP</sub>                    | 118.22  | 115.68  | 120.77  | 15.89  | 109.08  | 106.24  | 111.92  | 17.72  |     |    |
| fR <sub>RCP</sub>                    | 45.37   | 43.91   | 46.82   | 9.09   | 38.90   | 37.76   | 40.05   | 7.16   |     |    |
| La <sub>CRCP</sub>                   | 4.22    | 4.10    | 4.34    | 0.74   | 4.23    | 4.14    | 4.33    | 0.62   |     |    |
| VO <sub>2max</sub>                   | 51.73   | 50.74   | 52.72   | 6.20   | 49.15   | 48.04   | 50.26   | 6.93   |     |    |
| VO <sub>2maxA</sub>                  | 4008.06 | 3936.89 | 4079.23 | 444.10 | 3799.83 | 3725.04 | 3874.62 | 466.70 |     |    |
| RER <sub>max</sub>                   | 1.11    | 1.10    | 1.11    | 0.03   | 1.09    | 1.07    | 1.11    | 0.14   |     |    |
| HR <sub>max</sub>                    | 181.91  | 180.25  | 183.57  | 10.36  | 176.18  | 174.51  | 177.86  | 10.44  |     |    |
| VE <sub>max</sub>                    | 150.64  | 147.60  | 153.69  | 19.01  | 157.42  | 153.45  | 161.38  | 24.74  |     |    |
| fR <sub>max</sub>                    | 58.10   | 56.55   | 59.65   | 9.67   | 56.58   | 55.05   | 58.12   | 9.58   |     |    |
| La <sub>Cmax</sub>                   | 9.52    | 9.25    | 9.80    | 1.71   | 12.11   | 10.42   | 13.80   | 10.50  |     |    |
| S <sub>AT</sub> /P <sub>AT</sub> *   | 11.20   | 10.97   | 11.43   | 1.43   | 177.83  | 172.91  | 182.76  | 30.73  |     |    |
| S <sub>RCP</sub> /P <sub>RCP</sub> * | 14.28   | 14.01   | 14.55   | 1.69   | 260.77  | 254.40  | 267.13  | 39.73  |     |    |
| S <sub>max</sub> /P <sub>max</sub> * | 16.15   | 15.86   | 16.43   | 1.76   | 311.06  | 303.86  | 318.27  | 44.96  |     |    |

Footnote: Abbreviations: CPET, cardiopulmonary exercise test; TE, trademill; CE, cycle ergometer; CI, confidence interval; SD, standard deviation; VO<sub>2AT</sub>, relative VO<sub>2</sub> at AT (mL·min<sup>-1</sup>·kg<sup>-1</sup>); VO<sub>2ATA</sub>, absolute VO<sub>2</sub> at AT (mL·min<sup>-1</sup>); RER<sub>AT</sub>, respiratory exchange ratio at AT; HR<sub>AT</sub>, heart rate at AT (bpm); VE<sub>AT</sub>, pulmonary ventilation at AT (L·min<sup>-1</sup>); fR<sub>AT</sub>, respiratory frequency at AT (breaths per minute); La<sub>CAT</sub>, lactate concentration at AT (mmol·L<sup>-1</sup>); VO<sub>2RCP</sub>, relative VO<sub>2</sub> at RCP (mL·min<sup>-1</sup>·kg<sup>-1</sup>); VO<sub>2RCPA</sub>, absolute VO<sub>2</sub> at RCP (mL·min<sup>-1</sup>); VO<sub>2RCP</sub>, relative VO<sub>2</sub> at RCP (mL·min<sup>-1</sup>·kg<sup>-1</sup>); RER<sub>RCP</sub>, respiratory exchange ratio at RCP; HR<sub>RCP</sub>, heart rate at RCP (bpm); VE<sub>RCP</sub>, pulmonary ventilation at RCP (L·min<sup>-1</sup>); fR<sub>RCP</sub>, respiratory frequency at RCP (breaths per minute); La<sub>Cmax</sub>, lactate concentration at RCP (mmol·L<sup>-1</sup>); VO<sub>2max</sub>, relative maximal VO<sub>2</sub> (mL·min<sup>-1</sup>·kg<sup>-1</sup>); VO<sub>2maxA</sub>, absolute maximal VO<sub>2</sub> (mL·min<sup>-1</sup>); RER<sub>max</sub>, maximal

respiratory exchange ratio;  $HR_{max}$ , maximal heart rate (bpm);  $VE_{max}$ , maximal pulmonary ventilation ( $L \cdot min^{-1}$ );  $fR_{max}$ , maximal respiratory frequency;  $Lac_{max}$ , maximal lactate concentration ( $mmol \cdot L^{-1}$ );  $S_{AT}$ , speed at AT ( $km \cdot h^{-1}$ );  $P_{AT}$ , power at AT (watt);  $S_{RCP}$ , speed at RCP ( $km \cdot h^{-1}$ );  $P_{RCP}$ , power at RCP (watt);  $S_{max}$ , maximal speed ( $km \cdot h^{-1}$ );  $P_{max}$ , maximal power (watt).  
\*speed for TE, power for CE.
